# Supplementary material for: Transforming CdS into an efficient visible light photocatalyst for selective oxidation of saturated primary C–H bonds under ambient conditions
Source: Royal Society of Chemistry journal article supplement (doi:10.1039/c2sc20603j), 2012-01-01
Supplement: c2sc20603j.pdf [file c2sc20603j.pdf]

## Supporting information for the manuscript

# Transforming CdS into an efficient visible light photocatalyst for selective oxidation of saturated primary C–H bonds under ambient conditions

Yanhui Zhang,<sup>a</sup> Nan Zhang,<sup>a</sup> Zi-Rong Tang,<sup>b</sup> and Yi-Jun Xu<sup>\*a,b</sup>

<sup>a</sup> State Key Laboratory Breeding Base of Photocatalysis, College of Chemistry and Chemical Engineering, Fuzhou University, Fuzhou 350002, P.R. China.

<sup>b</sup> College of Chemistry and Chemical Engineering, New Campus, Fuzhou University, Fuzhou, 350108, P.R. China.

<sup>\*</sup>To whom correspondence should be addressed. E-mail: [yjxu@fzu.edu.cn](mailto:yjxu@fzu.edu.cn)

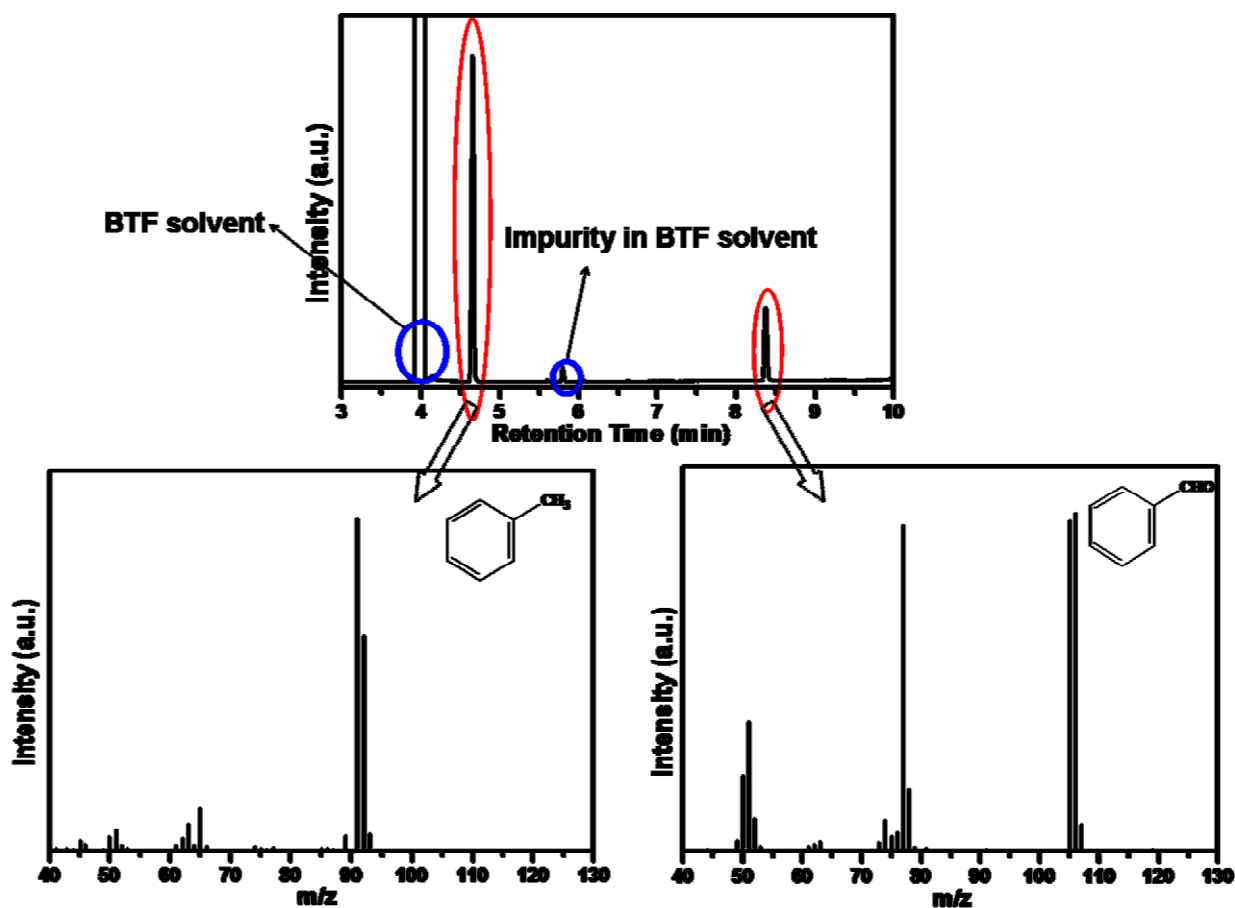

Fig. S1 The spectra of GC and GC-MS to identify toluene and benzaldehyde in the reaction system.

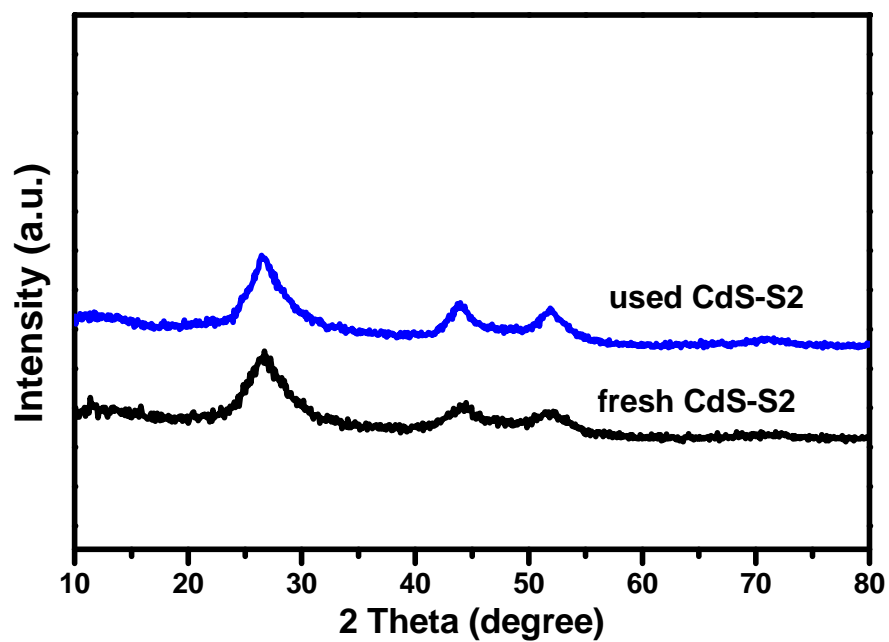

**Fig. S2** Contrast XRD patterns of the fresh CdS-S2 and used CdS-S2 after photocatalytic selective oxidation of toluene under visible light irradiation.

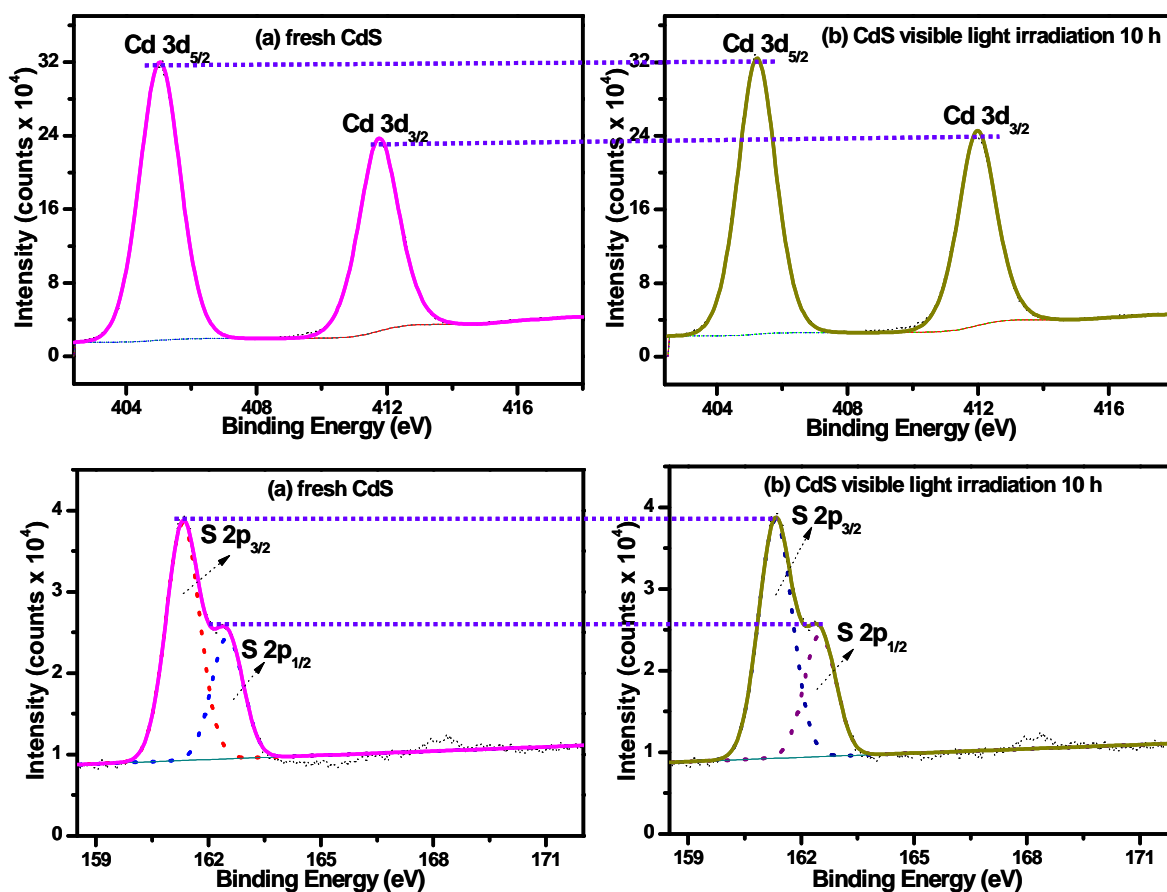

**Fig. S3** Contrast XPS spectra of fresh CdS-S2 and used CdS-S2 samples after visible light irradiation; the typical Cd 3d spectra with normalized intensity for fresh and used CdS-S2 samples (upper figure), and the typical S 2p spectra with normalized intensity for fresh and used CdS-S2 samples after visible light irradiation (lower figure).

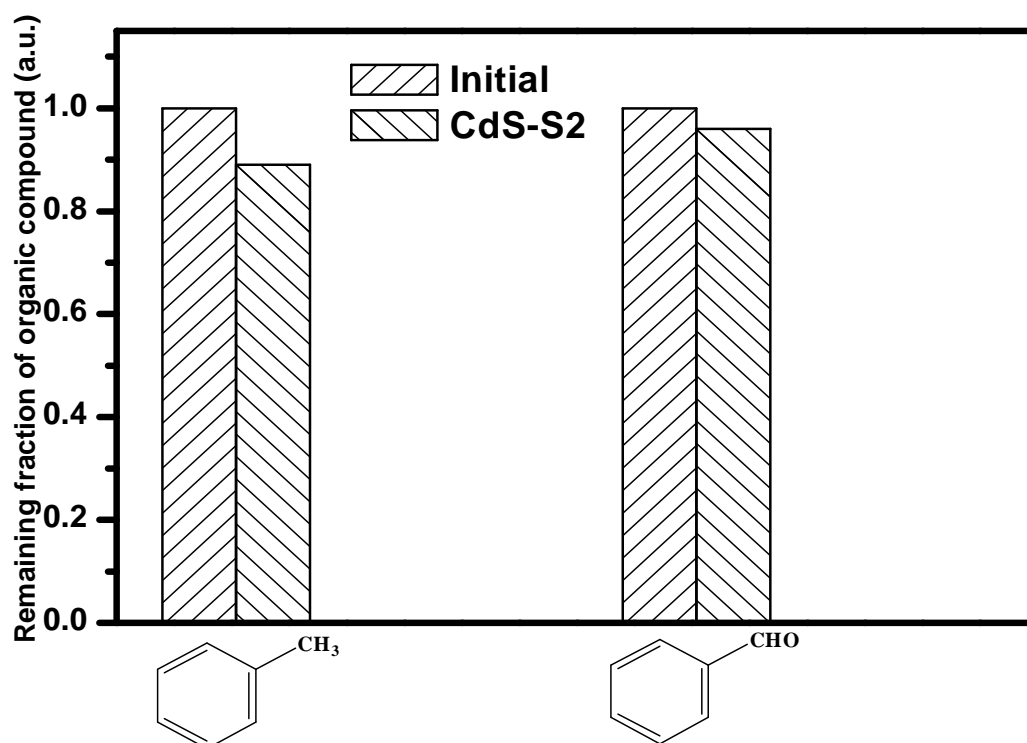

**Fig. S4** Bar plot showing the remaining fraction of toluene and benzaldehyde after the adsorption-desorption equilibrium is reached in the dark over the as-prepared optimum CdS-S2 photocatalyst.

**Table S1** The detailed estimation of average crystallite size for commercial CdS and sphere CdS-1 with hexagonal phase.

| 2θ (deg) | hkl   | D <sub>hkl</sub> (nm) |                |
|----------|-------|-----------------------|----------------|
|          |       | Sphere CdS-1          | Commercial CdS |
| 24.8     | (100) | 2.2                   | 25.1           |
| 26.5     | (002) | 3.1                   | 29.5           |
| 28.2     | (101) | 2.0                   | 20.8           |
| 43.7     | (110) | 2.2                   | 26.9           |
| 47.8     | (103) | 1.5                   | 23.1           |
| 51.8     | (112) | 1.6                   | 35.1           |

The average crystallite size for sphere CdS-1 is about **2.1 nm**=(2.2+3.1+2.0+2.2+1.5+1.6)/6; the average crystallite size for commercial CdS is about **26.7 nm**=(25.1+29.5+20.8+26.9+23.1+35.1)/6.
